# Supplementary material for: Medicinal Plants for the Treatment of Mental Diseases in Pregnancy: An In Vitro Safety Assessment
Source: PubMed Central journal article supplement — Planta Med. 2021 Oct 8;88(12):1036–46. doi: 10.1055/a-1628-8132 (PMC9519192; doi:10.1055/a-1628-8132), 2021-10-08
Supplement: 10-1055-a-1628-8132-sup_pmf0573.pdf [file 10-1055-a-1628-8132-sup_pmf0573.pdf]

## Original Papers

### Medicinal Plants for the Treatment of Mental Diseases in Pregnancy: An *In Vitro* Safety Assessment

Deborah Spiess<sup>1,2,\*</sup>, Moritz Winker<sup>3,4,\*</sup>, Antoine Chauveau<sup>2</sup>, Vanessa Fabienne Abegg<sup>2</sup>, Olivier Potterat<sup>2</sup>, Matthias Hamburger<sup>2</sup>, Carsten Gründemann<sup>3,4,\*\*</sup>, Ana Paula Simões-Wüst<sup>1,\*\*</sup>

#### Affiliations

<sup>1</sup> Department of Obstetrics, University Hospital Zurich, University of Zurich, Zurich, Switzerland

<sup>2</sup> Division of Pharmaceutical Biology, Department of Pharmaceutical Sciences, University of Basel, Basel, Switzerland

<sup>3</sup> Center for Complementary Medicine, Institute for Infection Prevention and Hospital Epidemiology, University of Freiburg, Faculty of Medicine, Freiburg, Germany

<sup>4</sup> Translational Complementary Medicine, Department of Pharmaceutical Sciences, University of Basel, Basel, Switzerland

\* These authors contributed equally to the work and should be considered as joint first authors.

\*\* These authors contributed equally to the work and should be considered as joint last authors.

#### Correspondence

***PD Dr. Ana Paula Simões-Wüst***

University Hospital of Zurich

Department of Obstetrics

Schmelzbergstrasse 12/PF 125, Path G51a

8091 Zurich

Switzerland

Phone: +41 44 255 51 31

Fax: +41 44 255 44 30

anapaula.simoes-wuest@usz.ch

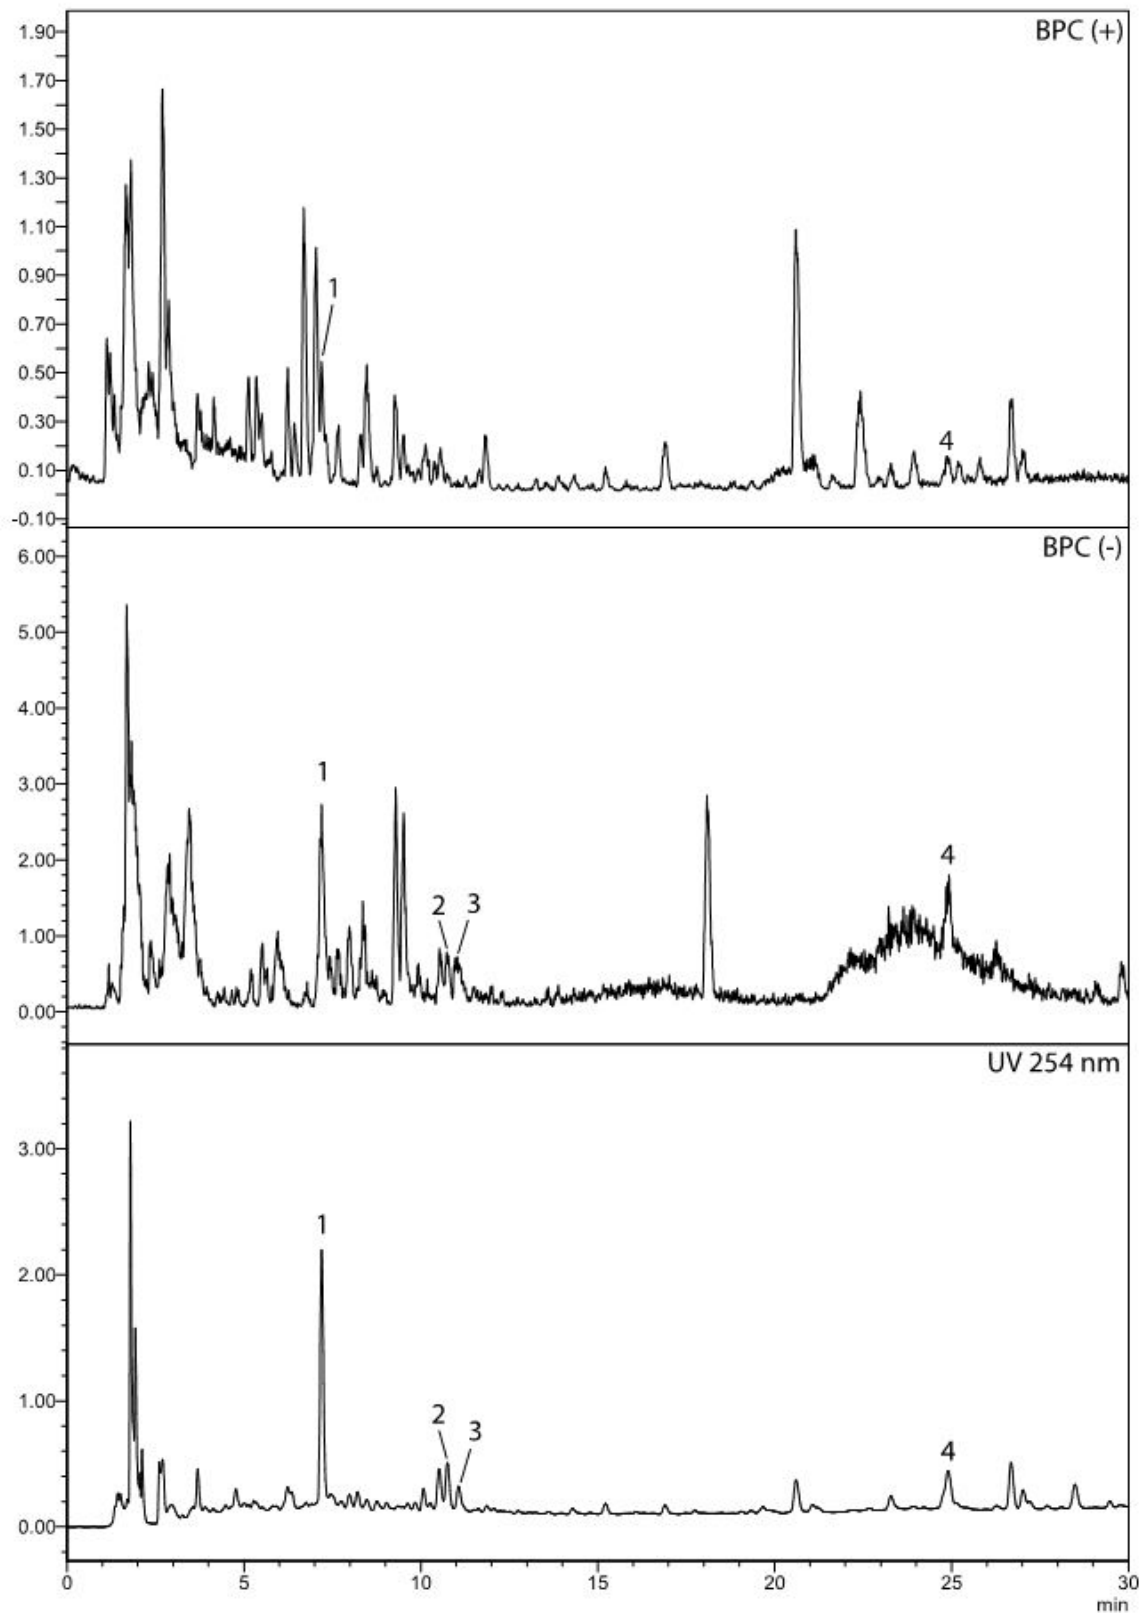

**Fig. 1S.** HPLC-UV-MS analysis of *Valeriana officinalis* 70% EtOH extract. BPC: base peak chromatogram. **1:** chlorogenic acid, **2** and **3:** dicaffeoylquinic acid isomers (tentative assignment), **4:** valerenic acid.

**Table 1S.** Retention times and spectroscopic data of annotated peaks in *Valeriana officinalis* 70% EtOH extract.

| Peak number | Retention time (min) | UV maxima (nm) | ESI MS (+) (m/z)                  | ESI MS (-) (m/z)         | Identification        |
|-------------|----------------------|----------------|-----------------------------------|--------------------------|-----------------------|
| 1           | 7.2                  | 206, 310, 327  | 354.9 [M+H] <sup>+</sup>          | 353.1 [M-H] <sup>-</sup> | Chlorogenic acid      |
| 2           | 10.8                 | 209, 310, 327  | 516.9 [M+H] <sup>+</sup><br>499.0 | 515.1 [M-H] <sup>-</sup> | Dicaffeoylquinic acid |
| 3           | 11.1                 | 217, 310, 327  | 516.9 [M+H] <sup>+</sup><br>499.0 | 515.1 [M-H] <sup>-</sup> | Dicaffeoylquinic acid |
| 4           | 24.9                 | 222            | 235.1 [M+H] <sup>+</sup>          | 233.1 [M-H] <sup>-</sup> | Valerenic acid        |

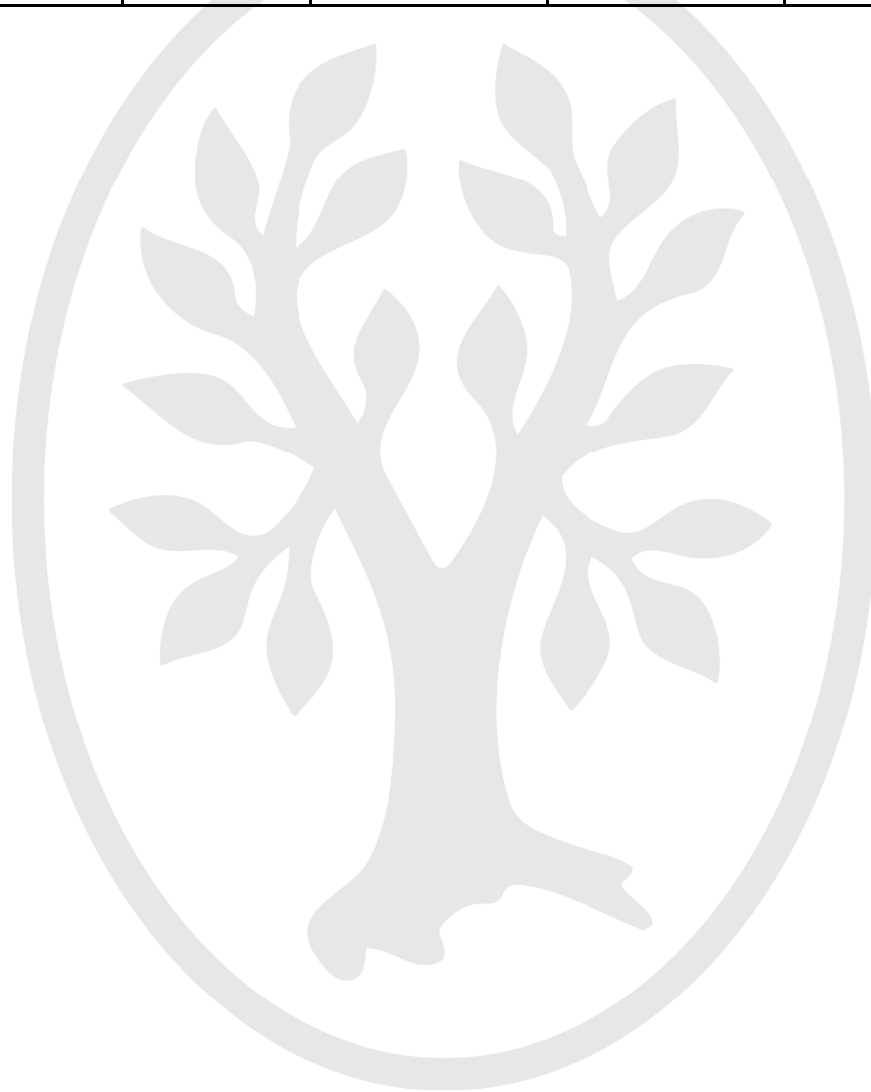

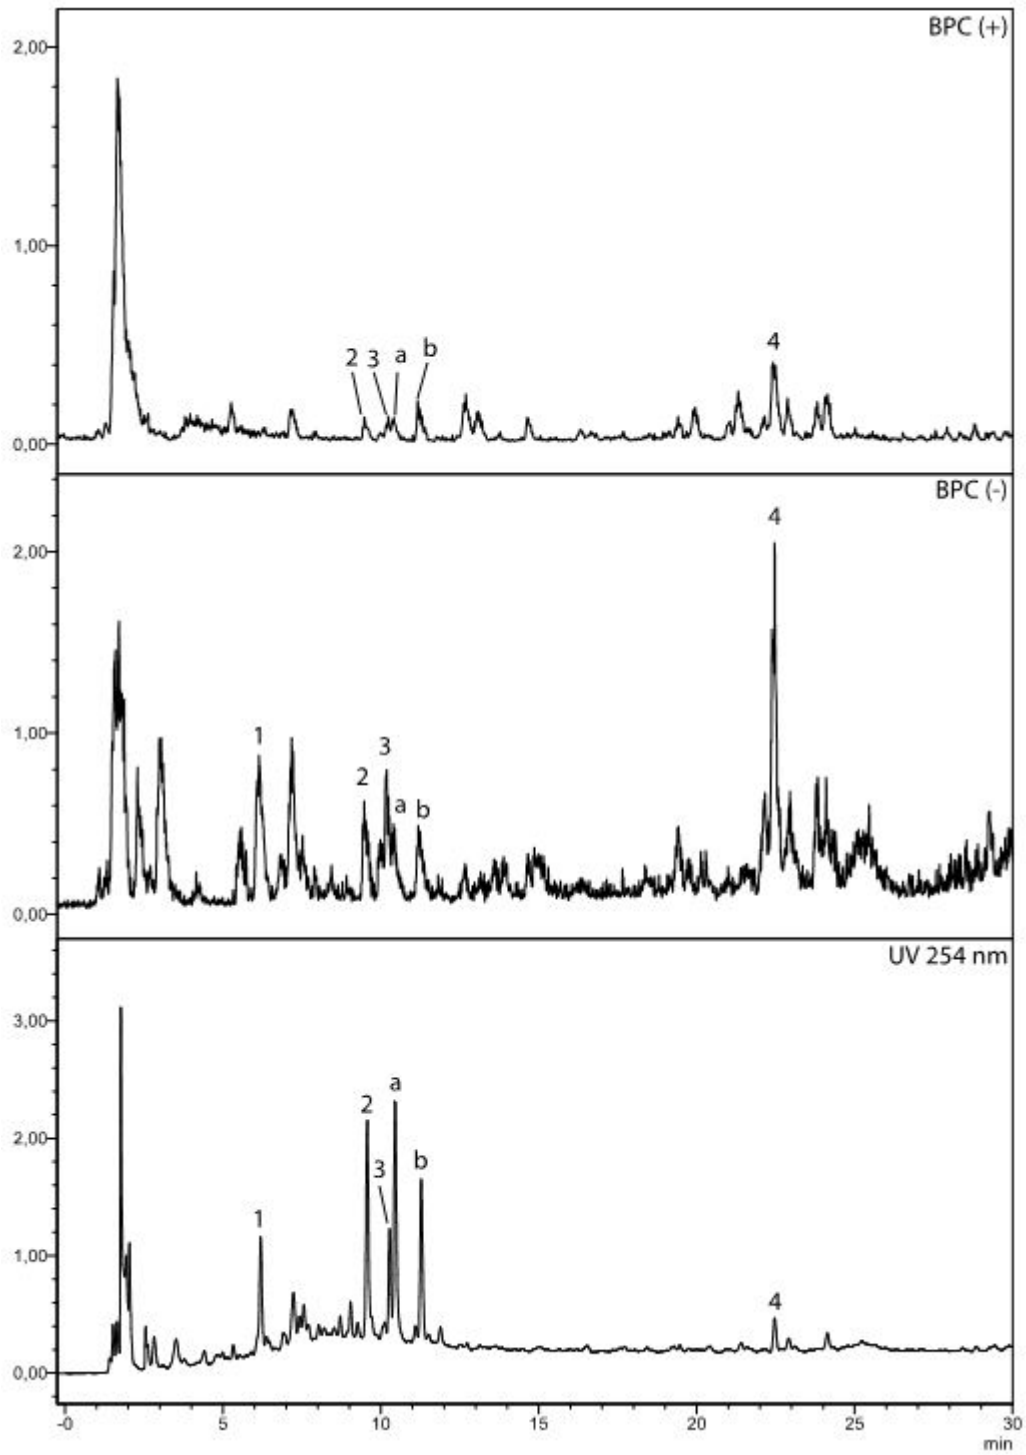

**Fig. 2S.** HPLC-UV-MS analysis of *Humulus lupulus* 70% EtOH extract. BPC: base peak chromatogram. **1:** chlorogenic acid, **2:** isoquercitrin, **3:** kaempferol hexoside (tentative assignment), **4:** xanthohumol, **a:** unidentified flavonoid, MW 550 amu, **b:** unidentified flavonoid, MW 534 amu.

**Table 2S.** Retention time and spectroscopic data of annotated peaks in *Humulus lupulus* 70% EtOH extract.

| Peak number | Retention time (min) | UV maxima (nm) | ESI MS (+) (m/z)                  | ESI MS (-) (m/z)         | Identification         |
|-------------|----------------------|----------------|-----------------------------------|--------------------------|------------------------|
| 1           | 6.2                  | 203, 300, 325  | 354.9 [M+H] <sup>+</sup>          | 353.1 [M-H] <sup>-</sup> | Chlorogenic acid       |
| 2           | 9.6                  | 203, 255, 353  | 465.1 [M+H] <sup>+</sup>          | 463.0 [M-H] <sup>-</sup> | Isoquercitrin          |
| 3           | 10.3                 | 201, 265, 343  | 448.9 [M+H] <sup>+</sup><br>286.7 | 447.0 [M-H] <sup>-</sup> | Kaempferol hexoside    |
| 4           | 22.5                 | 222, 369       | 354.9 [M+H] <sup>+</sup>          | 353.0 [M-H] <sup>-</sup> | Xanthohumol            |
| a           | 10.5                 | 204, 255, 353  | 550.8 [M+H] <sup>+</sup>          | 549.2 [M-H] <sup>-</sup> | Unidentified flavonoid |
| b           | 11.3                 | 205, 265, 346  | 534.9 [M+H] <sup>+</sup>          | 533.0 [M-H] <sup>-</sup> | Unidentified flavonoid |

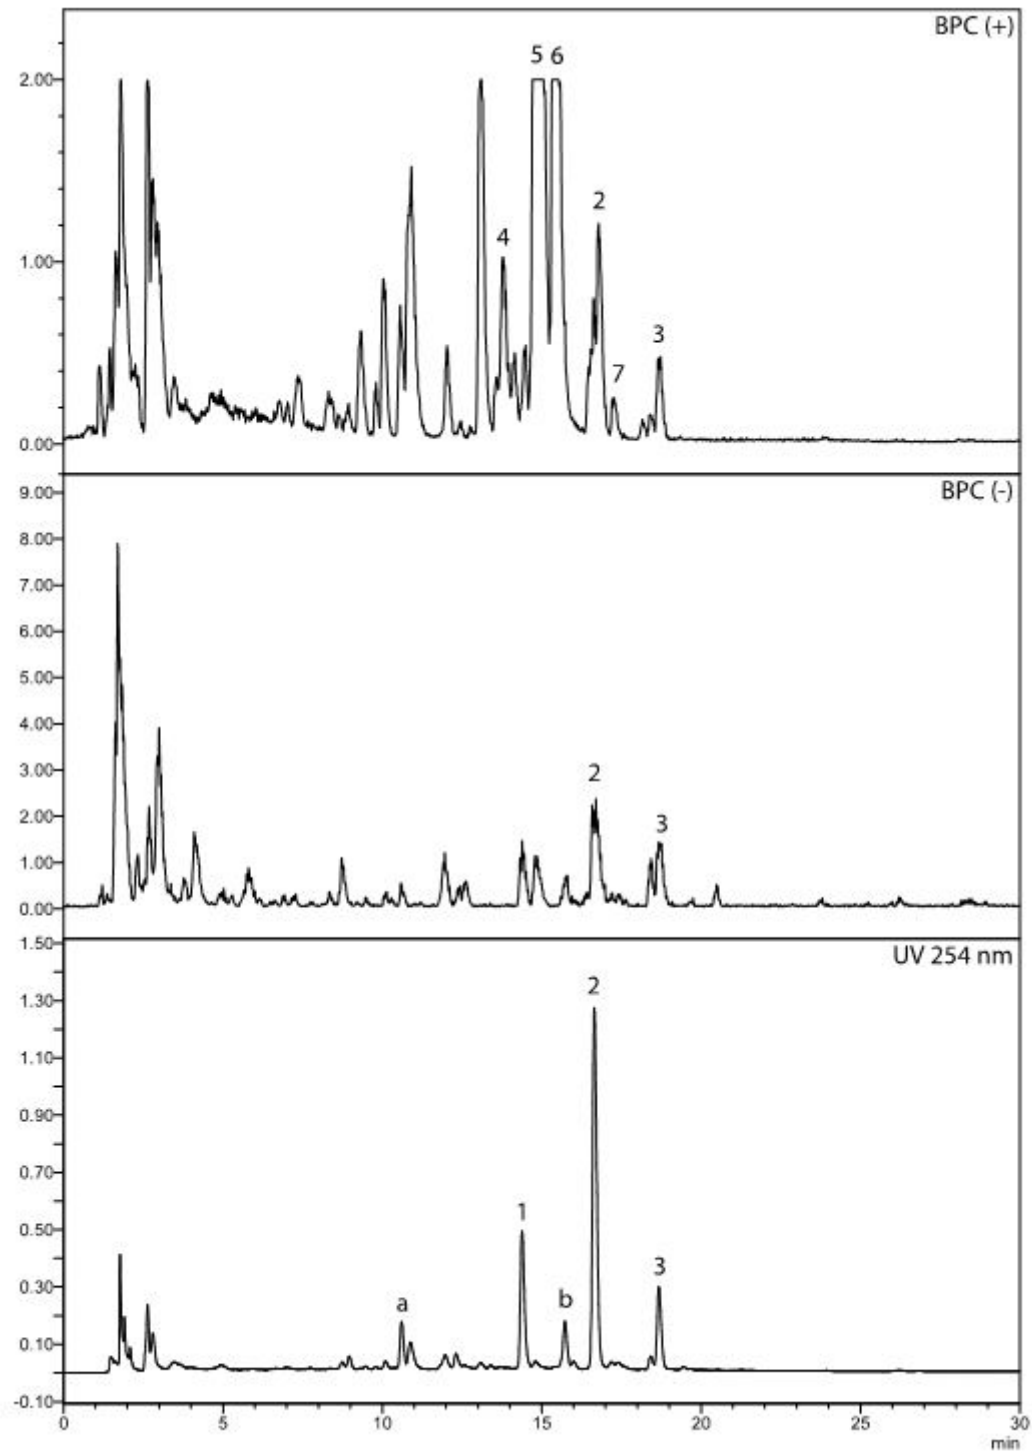

**Fig. 3S.** HPLC-UV-MS analysis of *Eschscholzia californica* 70% EtOH extract. BPC: base peak chromatogram. **1:** rutin rhamnoside (tentative assignment), **2:** rutin, **3:** rhamnoside of *O*-methyl quercetin (tentative assignment), **4:** protopine, **5:** californidine, **6:** escholzine, **7:** neocaryachine-7-*O*-methyl ether *N*-metho salt (CAS-Nr. 1310405-84-5, tentative assignment), **a:** unidentified flavonoid, MW 772 amu, **b:** unidentified flavonoid, MW 624 amu.

**Table 3S.** Retention time and spectroscopic data of annotated peaks in *Eschscholzia californica* 70% EtOH extract.

| Peak number | Retention time (min) | UV maxima (nm) | ESI MS (+) (m/z)         | ESI MS (-) (m/z)         | Identification                              |
|-------------|----------------------|----------------|--------------------------|--------------------------|---------------------------------------------|
| 1           | 14.4                 | 219, 255, 353  | 757.1 [M+H] <sup>+</sup> | 755.1 [M-H] <sup>-</sup> | Rutin rhamnoside                            |
| 2           | 16.7                 | 216, 255, 353  | 611.0 [M+H] <sup>+</sup> | 609.1 [M-H] <sup>-</sup> | Rutin                                       |
| 3           | 18.7                 | 204, 254, 353  | 625.1 [M+H] <sup>+</sup> | 623.1 [M-H] <sup>-</sup> | Rhamnoside of O-methyl quercetin            |
| 4           | 13.8                 | * OV           | 354.0 [M+H] <sup>+</sup> | -                        | Protopine                                   |
| 5           | 14.9                 | * OV           | 337.9 [M+H] <sup>+</sup> | -                        | Californidine                               |
| 6           | 15.5                 | * OV           | 324.0 [M+H] <sup>+</sup> | -                        | Escholzine                                  |
| 7           | 17.3                 | * OV           | 340.0 [M+H] <sup>+</sup> | -                        | Neocaryachine-7-O-methyl ether N-metho salt |
| a           | 10.6                 | 202, 255, 353  | 773.0 [M+H] <sup>+</sup> | 771.1 [M-H] <sup>-</sup> | Unidentified flavonoid                      |
| b           | 18.7                 | 204, 254, 353  | 625.1 [M+H] <sup>+</sup> | 623.1 [M-H] <sup>-</sup> | Unidentified flavonoid                      |

\* UV spectrum overlapped by coeluting flavonoids.

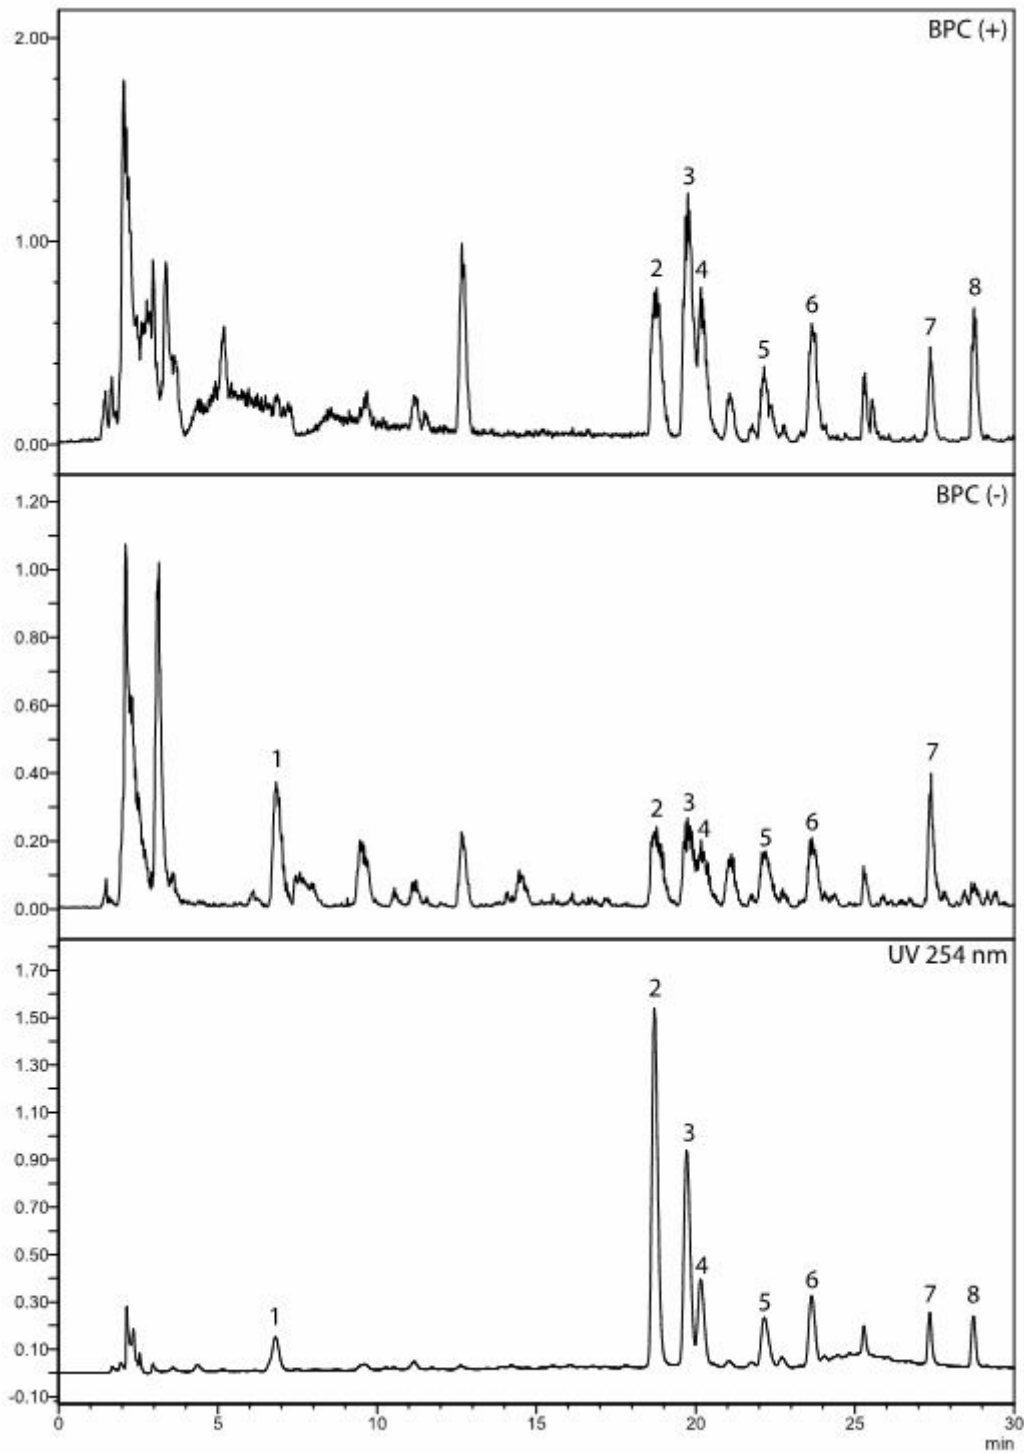

**Fig. 4S.** HPLC-UV-MS analysis of *Hypericum perforatum* 70% EtOH extract. BPC: base peak chromatogram. **1:** chlorogenic acid isomer (tentative assignment), **2:** rutin, **3:** hyperosid, **4:** isoquercitrin, **5:** miquelianin (quercetin-3-*O*-glucuronide), **6:** quercitrin, **7:** quercetin, **8:** biapigenin.



**Table 4S.** Retention time and spectroscopic data of annotated peaks in *Hypericum perforatum* 70% EtOH extract.

| Peak number | Retention time (min) | UV maxima (nm) | ESI MS (+) (m/z)         | ESI MS (-) (m/z)         | Identification          |
|-------------|----------------------|----------------|--------------------------|--------------------------|-------------------------|
| 1           | 6.8                  | 210, 300, 325  | 355.0 [M+H] <sup>+</sup> | 353.1 [M-H] <sup>-</sup> | Chlorogenic acid isomer |
| 2           | 18.7                 | 221, 255, 351  | 609.0 [M+H] <sup>+</sup> | 611.0 [M-H] <sup>-</sup> | Rutin                   |
| 3           | 19.7                 | 215, 255, 353  | 464.9 [M+H] <sup>+</sup> | 463.1 [M-H] <sup>-</sup> | Hyperosid               |
| 4           | 20.2                 | 201, 255, 353  | 465.0 [M+H] <sup>+</sup> | 463.1 [M-H] <sup>-</sup> | Isoquercitrin           |
| 5           | 22.2                 | 201, 255, 353  | 478.9 [M+H] <sup>+</sup> | 477.0 [M-H] <sup>-</sup> | Miquelianin             |
| 6           | 23.6                 | 201, 254, 349  | 449.0 [M+H] <sup>+</sup> | 447.0 [M-H] <sup>-</sup> | Quercitrin              |
| 7           | 27.4                 | 204, 254, 370  | 302.9 [M+H] <sup>+</sup> | 301.0 [M-H] <sup>-</sup> | Quercetin               |
| 8           | 28.7                 | 208, 268, 330  | 538.9 [M+H] <sup>+</sup> | 537.0 [M-H] <sup>-</sup> | Biapigenin              |

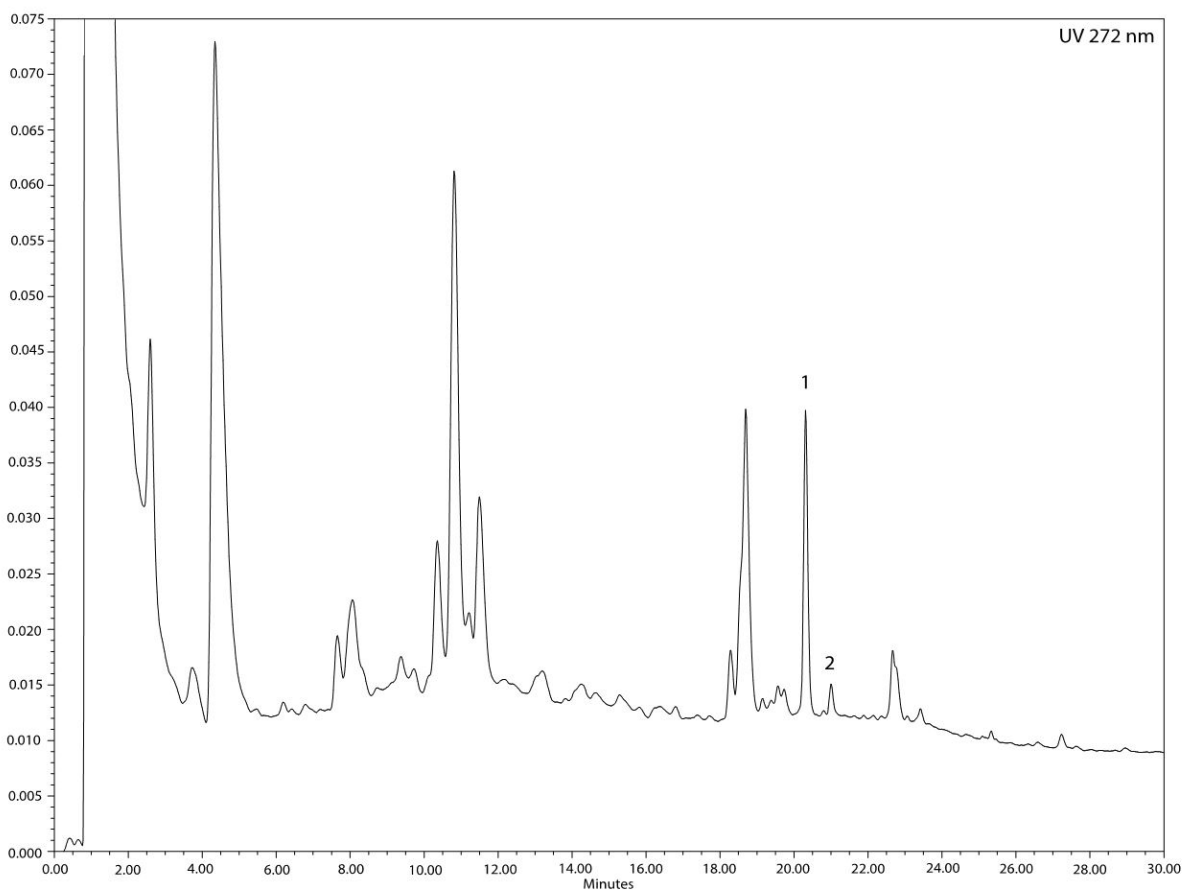**Fig. 5S.** HPLC-UV analysis of hyperforin and adhyperforin in *Hypericum perforatum* extract. **1:** hyperforin, **2:** adhyperforin.

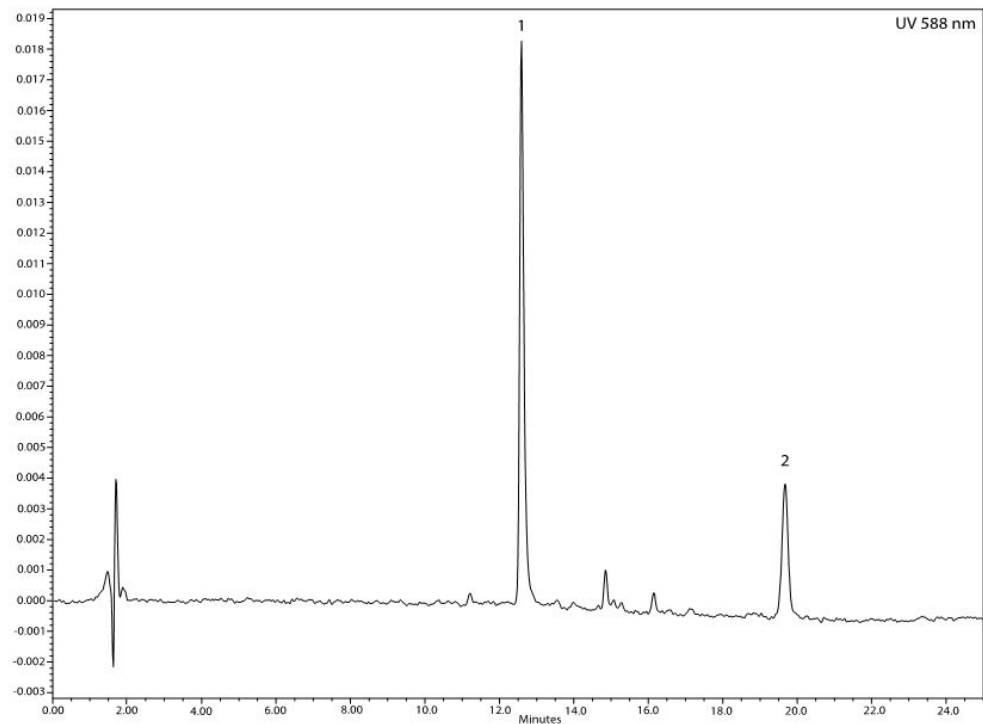

**Fig. 6S.** HPLC-UV analysis of hypericin and pseudohypericin in *Hypericum perforatum* extract. **1:** pseudohypericin, **2:** hypericin.

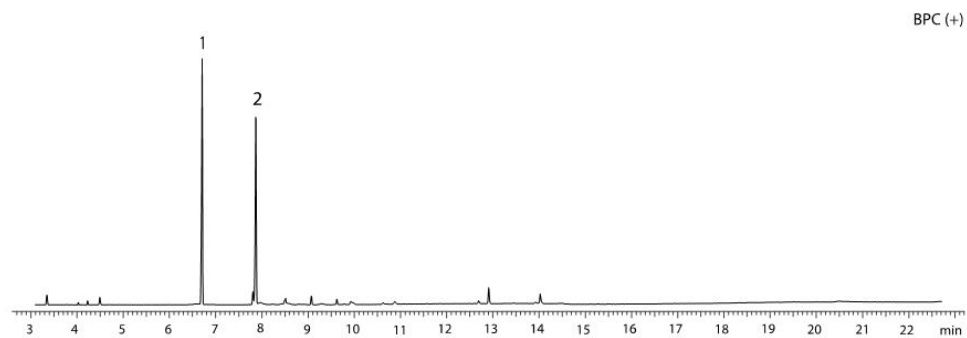

**Fig. 7S.** GC-MS analysis of *Lavandula angustifolia* essential oil. **1:** linalool, **2:** linalyl acetate.

**Table 5S.** Retention time, peak area, and identification of constituents of *Lavandula angustifolia* essential oil.

| Peak number | Retention time (min) | Area (%) | Identification  | Spectrum identity (% NIST) |
|-------------|----------------------|----------|-----------------|----------------------------|
| 1           | 6.71                 | 43.4     | Linalool        | 97                         |
| 2           | 7.87                 | 38.6     | Linalyl acetate | 90                         |

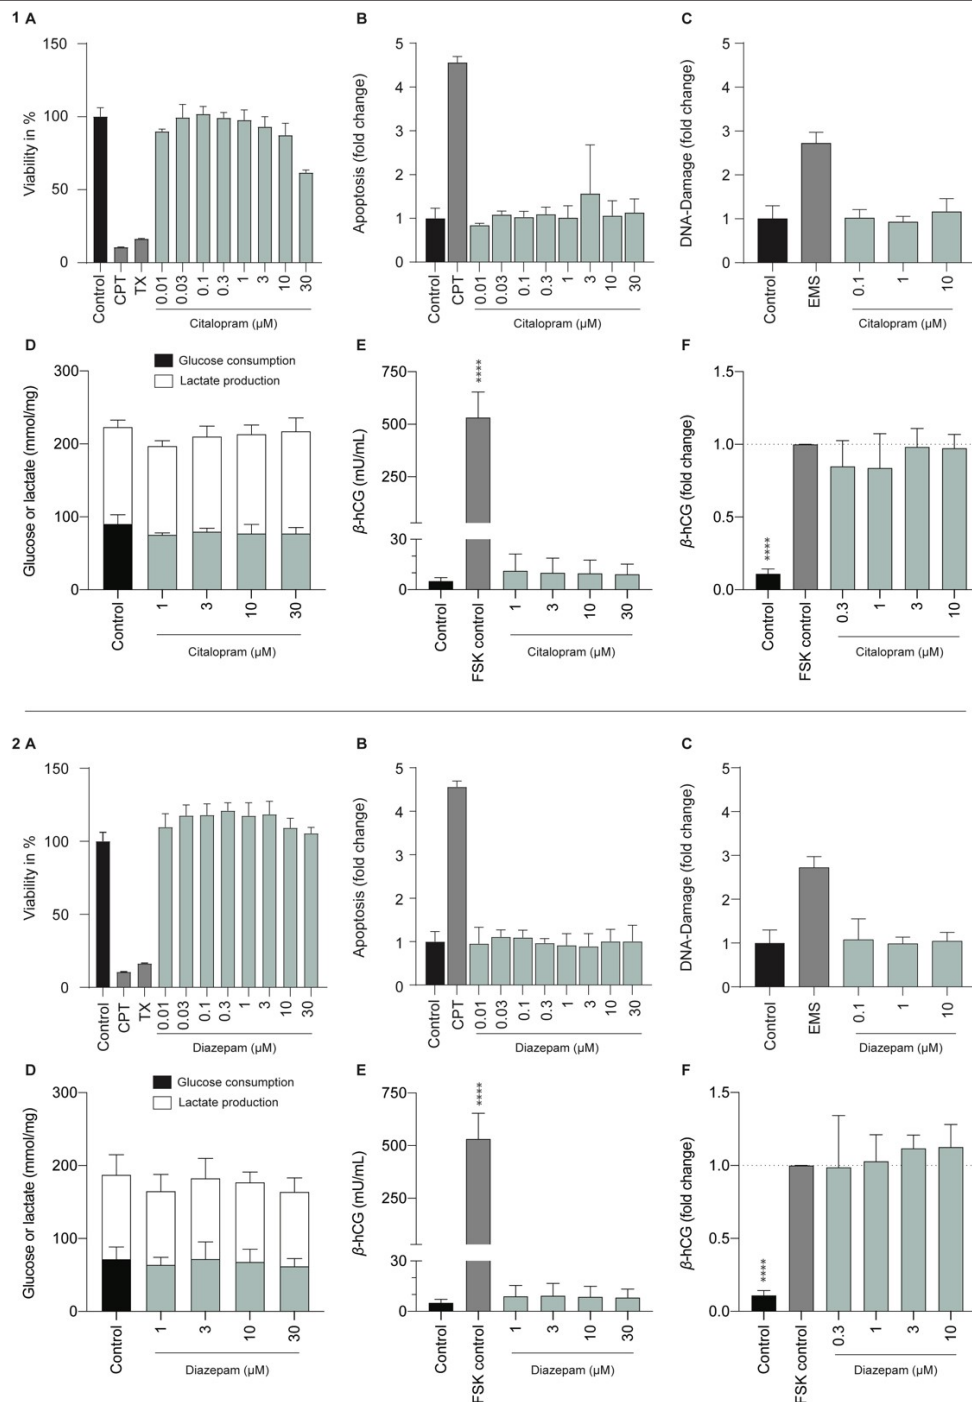

**Fig. 8S.** Effects of different concentrations of citalopram (**1**) and diazepam (**2**) on *in vitro* safety using undifferentiated BeWo b30 cells. All controls consisted of cell culture media containing 0.2% of DMSO. All data were obtained from at least 3 independent experiments (D–F in triplicate) and are shown as mean  $\pm$  SD: \* $p < 0.05$ . (**A**) Effects on cell viability after treatment for 72 h as percent compared to the untreated control; treatments with camptothecin (CPT) and Triton-X-100 (TX) serve as toxicity controls. Results were normalized to untreated control signal = 100%. (**B**) Effects on cell death after treatment for 72 h as fold changes compared to the untreated controls with camptothecin (CPT) for apoptosis. (**C**) Effects on tail DNA after treatment for 3 h as fold changes compared to the untreated control with ethyl methanesulfonate (EMS) as a positive control. (**D**) Effects on glucose consumption and lactate production after treatment for 48 h expressed in mmol and normalized per amount of protein (mg). (**E**) Effects on  $\beta$ -hCG secretion (mU/mL) by BeWo b30 cells upon 48 h treatment with increasing concentrations of citalopram (**1**) or diazepam (**2**) and 50  $\mu$ M FSK as a positive control. (**F**) Effects on FSK-induced differentiation of BeWo b30 cells as fold changes compared to the FSK control. Cells were pre-treated with test compound or cell culture medium for 24 h, before adding 5  $\mu$ M FSK for a further 24 h.

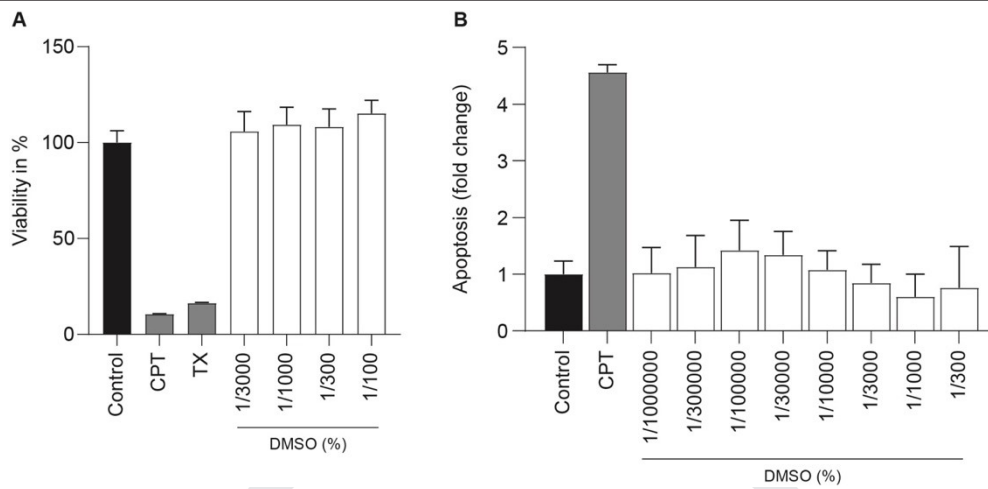

**Fig. 9S. (A)** Cytotoxic effects of DMSO (0.03–1%) on BeWo b30 cells. Viability assays were performed after a 72 h incubation period. Camptothecin (CPT) and Triton-X-100 (TX) were used as toxicity controls. **(B)** Effects of DMSO (0.0001–0.3%) on cell death after treatment for 72 h as fold changes compared to the untreated controls with camptothecin (CPT) for apoptosis. All data are represented as mean  $\pm$  SD of three independent experiments ( $n = 3$ ;  $p^* < 0.05$ ).
